# Supplementary material for: SAGD: a comprehensive sex-associated gene database from transcriptomes
Source: PubMed Central journal article supplement — Nucleic Acids Res. 2018 Oct 31;47(Database issue):D835–40. doi: 10.1093/nar/gky1040 (PMC6323940; doi:10.1093/nar/gky1040), 2018-10-31
Supplement: gky1040_supplemental_files.pdf [file gky1040_supplemental_files.pdf]

## Supplementary Material

Supplementary Table 1. Statistics of RNA-seq datasets and SAGs of 150 groups in SAGD.

| sagd_id <sup>1</sup> | species                 | Project <sup>2</sup> | tissue                                           | stage | sample                  | sample_M<br>_num <sup>4</sup> | sag_F_<br>num <sup>5</sup> | sag_M_<br>num <sup>6</sup> | sex<br>chromosome <sup>7</sup> | XorZ<br>_F <sup>8</sup> | XorZ<br>_M <sup>9</sup> | percent_Xo<br>rZ_F <sup>10</sup> | percent_Xo<br>rZ_M <sup>11</sup> |
|----------------------|-------------------------|----------------------|--------------------------------------------------|-------|-------------------------|-------------------------------|----------------------------|----------------------------|--------------------------------|-------------------------|-------------------------|----------------------------------|----------------------------------|
|                      |                         |                      |                                                  |       | _F_nu<br>m <sup>3</sup> |                               |                            |                            |                                |                         |                         |                                  |                                  |
| SAGD_00139           | Bos taurus              | SRP052656            | fat                                              | adult | 5                       | 5                             | 10                         | 8                          | XY                             | 0                       | 6                       | 0.0                              | 75.0                             |
| SAGD_00140           | Bos taurus              | SRP052656            | liver                                            | adult | 5                       | 5                             | 12                         | 11                         | XY                             | 0                       | 6                       | 0.0                              | 54.5                             |
| SAGD_00141           | Bos taurus              | SRP052656            | muscle                                           | adult | 5                       | 4                             | 18                         | 14                         | XY                             | 1                       | 6                       | 5.6                              | 42.9                             |
| SAGD_00142           | Bos taurus              | SRP052656            | pituitary gland                                  | adult | 5                       | 5                             | 7                          | 27                         | XY                             | 0                       | 7                       | 0.0                              | 25.9                             |
| SAGD_00099           | Caenorhabditis brenneri | SRP016006            | whole body                                       | adult | 3                       | 3                             | 3583                       | 5465                       | NA                             | NA                      | NA                      | NA                               | NA                               |
| SAGD_00110           | Caenorhabditis elegans  | SRP034667            | whole body                                       | adult | 4                       | 4                             | 1227                       | 3345                       | XY                             | 275                     | 228                     | 22.4                             | 6.8                              |
| SAGD_00156           | Caenorhabditis elegans  | SRP062096            | gonadal precursors                               | larva | 5                       | 5                             | 21                         | 89                         | XY                             | 4                       | 18                      | 19.0                             | 20.2                             |
| SAGD_00157           | Caenorhabditis elegans  | SRP062096            | whole body                                       | larva | 5                       | 5                             | 3                          | 2                          | XY                             | 1                       | 0                       | 33.3                             | 0.0                              |
| SAGD_00100           | Caenorhabditis japonica | SRP016006            | whole body                                       | adult | 3                       | 3                             | 1855                       | 3384                       | NA                             | NA                      | NA                      | NA                               | NA                               |
| SAGD_00101           | Caenorhabditis remanei  | SRP016006            | whole body                                       | adult | 3                       | 3                             | 2799                       | 4485                       | NA                             | NA                      | NA                      | NA                               | NA                               |
| SAGD_00136           | Danio rerio             | SRP046222            | brain                                            | adult | 2                       | 2                             | 3                          | 14                         | NA                             | NA                      | NA                      | NA                               | NA                               |
| SAGD_00023           | Drosophila ananassae    | SRP006203            | whole body                                       | adult | 2                       | 2                             | 295                        | 2406                       | NA                             | NA                      | NA                      | NA                               | NA                               |
| SAGD_00134           | Drosophila melanogaster | SRP045429            | whole body                                       | adult | 10                      | 10                            | 1000                       | 5046                       | XY                             | 252                     | 575                     | 25.2                             | 11.4                             |
| SAGD_00161           | Drosophila melanogaster | SRP069203            | Adult whole organisms without gonad              | adult | 20                      | 20                            | 196                        | 1725                       | XY                             | 46                      | 190                     | 23.5                             | 11.0                             |
| SAGD_00183           | Drosophila melanogaster | SRP108530            | abdomen without digestive or reproductive system | adult | 6                       | 6                             | 191                        | 131                        | XY                             | 37                      | 19                      | 19.4                             | 14.5                             |
| SAGD_00184           | Drosophila melanogaster | SRP108530            | digestive plus excretory system                  | adult | 8                       | 8                             | 50                         | 59                         | XY                             | 13                      | 13                      | 26.0                             | 22.0                             |
| SAGD_00185           | Drosophila melanogaster | SRP108530            | genitalia                                        | adult | 8                       | 8                             | 270                        | 563                        | XY                             | 48                      | 74                      | 17.8                             | 13.1                             |

|                   |                                 |           |                                                 |        |   |   |      |      |    |      |      |      |      |
|-------------------|---------------------------------|-----------|-------------------------------------------------|--------|---|---|------|------|----|------|------|------|------|
| <b>SAGD_00186</b> | <i>Drosophila melanogaster</i>  | SRP108530 | gonad                                           | adult  | 8 | 8 | 1397 | 5987 | XY | 383  | 711  | 27.4 | 11.9 |
| <b>SAGD_00187</b> | <i>Drosophila melanogaster</i>  | SRP108530 | head                                            | adult  | 8 | 8 | 53   | 36   | XY | 10   | 20   | 18.9 | 55.6 |
| <b>SAGD_00188</b> | <i>Drosophila melanogaster</i>  | SRP108530 | reproductive system without gonad and genitalia | adult  | 6 | 6 | 952  | 1216 | XY | 140  | 102  | 14.7 | 8.4  |
| <b>SAGD_00189</b> | <i>Drosophila melanogaster</i>  | SRP108530 | thorax without digestive system                 | adult  | 6 | 6 | 86   | 41   | XY | 17   | 12   | 19.8 | 29.3 |
| <b>SAGD_00024</b> | <i>Drosophila mojavensis</i>    | SRP006203 | whole body                                      | adult  | 2 | 2 | 1000 | 2433 | NA | NA   | NA   | NA   | NA   |
| <b>SAGD_00022</b> | <i>Drosophila pseudoobscura</i> | SRP006203 | whole body                                      | adult  | 2 | 2 | 1124 | 3078 | XY | 501  | 885  | 44.6 | 28.8 |
| <b>SAGD_00028</b> | <i>Drosophila pseudoobscura</i> | SRP007818 | Carcass minus reproductive tract                | adult  | 2 | 2 | 175  | 2288 | XY | 83   | 671  | 47.4 | 29.3 |
| <b>SAGD_00029</b> | <i>Drosophila pseudoobscura</i> | SRP007818 | Dissected Gonad and Reproductive Tract          | adult  | 2 | 2 | 2567 | 5731 | XY | 1150 | 1554 | 44.8 | 27.1 |
| <b>SAGD_00025</b> | <i>Drosophila simulans</i>      | SRP006203 | whole body                                      | adult  | 4 | 3 | 861  | 2734 | XY | 182  | 365  | 21.1 | 13.4 |
| <b>SAGD_00030</b> | <i>Drosophila simulans</i>      | SRP007818 | Carcass minus reproductive tract                | adult  | 2 | 2 | 190  | 1566 | XY | 34   | 182  | 17.9 | 11.6 |
| <b>SAGD_00026</b> | <i>Drosophila virilis</i>       | SRP006203 | whole body                                      | adult  | 2 | 2 | 416  | 2370 | NA | NA   | NA   | NA   | NA   |
| <b>SAGD_00027</b> | <i>Drosophila yakuba</i>        | SRP006203 | whole body                                      | adult  | 2 | 2 | 594  | 2526 | XY | 120  | 314  | 20.2 | 12.4 |
| <b>SAGD_00078</b> | <i>Equus caballus</i>           | SRP012972 | blood                                           | adult  | 4 | 8 | 9    | 19   | XY | 1    | 0    | 11.1 | 0.0  |
| <b>SAGD_00079</b> | <i>Equus caballus</i>           | SRP012972 | muscle                                          | adult  | 4 | 8 | 1    | 2    | XY | 0    | 0    | 0.0  | 0.0  |
| <b>SAGD_00005</b> | <i>Gallus gallus</i>            | ERP009469 | brain                                           | embryo | 5 | 5 | 627  | 91   | ZW | 19   | 12   | 3.0  | 13.2 |
| <b>SAGD_00006</b> | <i>Gallus gallus</i>            | ERP009469 | bursa                                           | embryo | 5 | 5 | 106  | 25   | ZW | 5    | 1    | 4.7  | 4.0  |
| <b>SAGD_00007</b> | <i>Gallus gallus</i>            | ERP009469 | gonad                                           | embryo | 5 | 5 | 1882 | 331  | ZW | 51   | 44   | 2.7  | 13.3 |
| <b>SAGD_00008</b> | <i>Gallus gallus</i>            | ERP009469 | heart                                           | embryo | 5 | 5 | 106  | 2    | ZW | 4    | 0    | 3.8  | 0.0  |
| <b>SAGD_00009</b> | <i>Gallus gallus</i>            | ERP009469 | kidney                                          | embryo | 5 | 5 | 75   | 7    | ZW | 2    | 0    | 2.7  | 0.0  |
| <b>SAGD_00010</b> | <i>Gallus gallus</i>            | ERP009469 | liver                                           | embryo | 4 | 4 | 64   | 9    | ZW | 4    | 1    | 6.3  | 11.1 |
| <b>SAGD_00011</b> | <i>Gallus gallus</i>            | ERP009469 | lung                                            | embryo | 5 | 5 | 69   | 8    | ZW | 2    | 0    | 2.9  | 0.0  |

|                   |               |           |                                    |         |    |    |     |     |    |   |   |       |      |
|-------------------|---------------|-----------|------------------------------------|---------|----|----|-----|-----|----|---|---|-------|------|
| <b>SAGD_00012</b> | Gallus gallus | ERP009469 | muscle                             | embryo  | 5  | 5  | 73  | 16  | ZW | 3 | 2 | 4.1   | 12.5 |
| <b>SAGD_00013</b> | Gallus gallus | ERP009469 | spleen                             | embryo  | 4  | 5  | 47  | 8   | ZW | 1 | 1 | 2.1   | 12.5 |
| <b>SAGD_00001</b> | Homo sapiens  | ERP006650 | skeletal muscle                    | adult   | 3  | 2  | 20  | 26  | XY | 1 | 0 | 5.0   | 0.0  |
| <b>SAGD_00002</b> | Homo sapiens  | ERP007111 | skin                               | adult   | 10 | 10 | 8   | 15  | XY | 1 | 0 | 12.5  | 0.0  |
| <b>SAGD_00014</b> | Homo sapiens  | SRP001371 | adrenal gland                      | fetus   | 2  | 2  | 8   | 25  | XY | 1 | 1 | 12.5  | 4.0  |
| <b>SAGD_00015</b> | Homo sapiens  | SRP001371 | large intestine                    | fetus   | 3  | 3  | 13  | 26  | XY | 1 | 0 | 7.7   | 0.0  |
| <b>SAGD_00016</b> | Homo sapiens  | SRP001371 | small intestine                    | fetus   | 3  | 3  | 3   | 24  | XY | 2 | 0 | 66.7  | 0.0  |
| <b>SAGD_00019</b> | Homo sapiens  | SRP001558 | liver                              | adult   | 6  | 6  | 54  | 30  | XY | 3 | 0 | 5.6   | 0.0  |
| <b>SAGD_00032</b> | Homo sapiens  | SRP012682 | adrenal gland                      | unknown | 16 | 20 | 15  | 43  | XY | 2 | 0 | 13.3  | 0.0  |
| <b>SAGD_00033</b> | Homo sapiens  | SRP012682 | amygdala                           | unknown | 8  | 12 | 9   | 39  | XY | 2 | 0 | 22.2  | 0.0  |
| <b>SAGD_00034</b> | Homo sapiens  | SRP012682 | aorta                              | unknown | 18 | 20 | 2   | 37  | XY | 2 | 0 | 100.0 | 0.0  |
| <b>SAGD_00035</b> | Homo sapiens  | SRP012682 | atrium auricular region            | unknown | 17 | 20 | 30  | 49  | XY | 3 | 0 | 10.0  | 0.0  |
| <b>SAGD_00036</b> | Homo sapiens  | SRP012682 | blood                              | unknown | 16 | 19 | 10  | 18  | XY | 1 | 0 | 10.0  | 0.0  |
| <b>SAGD_00037</b> | Homo sapiens  | SRP012682 | breast                             | unknown | 15 | 20 | 396 | 143 | XY | 9 | 7 | 2.3   | 4.9  |
| <b>SAGD_00038</b> | Homo sapiens  | SRP012682 | Brodman (1909) area 24             | unknown | 18 | 20 | 13  | 33  | XY | 3 | 1 | 23.1  | 3.0  |
| <b>SAGD_00039</b> | Homo sapiens  | SRP012682 | Brodman (1909) area 9              | unknown | 16 | 19 | 28  | 37  | XY | 3 | 0 | 10.7  | 0.0  |
| <b>SAGD_00040</b> | Homo sapiens  | SRP012682 | C1 segment of cervical spinal cord | unknown | 17 | 18 | 5   | 37  | XY | 2 | 0 | 40.0  | 0.0  |
| <b>SAGD_00041</b> | Homo sapiens  | SRP012682 | caudate nucleus                    | unknown | 13 | 20 | 2   | 38  | XY | 2 | 0 | 100.0 | 0.0  |
| <b>SAGD_00042</b> | Homo sapiens  | SRP012682 | cerebellar hemisphere              | unknown | 13 | 20 | 72  | 41  | XY | 4 | 0 | 5.6   | 0.0  |
| <b>SAGD_00043</b> | Homo sapiens  | SRP012682 | cerebellum                         | unknown | 13 | 20 | 1   | 22  | XY | 1 | 0 | 100.0 | 0.0  |
| <b>SAGD_00044</b> | Homo sapiens  | SRP012682 | cerebral cortex                    | unknown | 12 | 20 | 5   | 36  | XY | 2 | 0 | 40.0  | 0.0  |
| <b>SAGD_00045</b> | Homo sapiens  | SRP012682 | coronary artery                    | unknown | 20 | 17 | 23  | 44  | XY | 3 | 0 | 13.0  | 0.0  |
| <b>SAGD_00046</b> | Homo sapiens  | SRP012682 | cortex of kidney                   | unknown | 8  | 20 | 22  | 35  | XY | 3 | 0 | 13.6  | 0.0  |
| <b>SAGD_00047</b> | Homo sapiens  | SRP012682 | EBV-transformed lymphocyte         | unknown | 19 | 20 | 21  | 39  | XY | 3 | 0 | 14.3  | 0.0  |
| <b>SAGD_00048</b> | Homo sapiens  | SRP012682 | esophagogastric junction           | unknown | 14 | 20 | 9   | 39  | XY | 2 | 0 | 22.2  | 0.0  |

|                   |              |           |                                |         |    |    |      |       |    |     |     |       |     |
|-------------------|--------------|-----------|--------------------------------|---------|----|----|------|-------|----|-----|-----|-------|-----|
| <b>SAGD_00049</b> | Homo sapiens | SRP012682 | esophagus mucosa               | unknown | 17 | 20 | 6    | 36    | XY | 2   | 0   | 33.3  | 0.0 |
| <b>SAGD_00050</b> | Homo sapiens | SRP012682 | esophagus muscularis<br>mucosa | unknown | 16 | 20 | 4    | 33    | XY | 3   | 0   | 75.0  | 0.0 |
| <b>SAGD_00051</b> | Homo sapiens | SRP012682 | gonad                          | unknown | 20 | 17 | 2483 | 15864 | XY | 203 | 414 | 8.2   | 2.6 |
| <b>SAGD_00052</b> | Homo sapiens | SRP012682 | greater omentum                | unknown | 18 | 19 | 27   | 34    | XY | 3   | 0   | 11.1  | 0.0 |
| <b>SAGD_00053</b> | Homo sapiens | SRP012682 | heart left ventricle           | unknown | 12 | 20 | 5    | 30    | XY | 3   | 0   | 60.0  | 0.0 |
| <b>SAGD_00054</b> | Homo sapiens | SRP012682 | hippocampus proper             | unknown | 14 | 20 | 11   | 35    | XY | 4   | 0   | 36.4  | 0.0 |
| <b>SAGD_00055</b> | Homo sapiens | SRP012682 | hypothalamus                   | unknown | 17 | 20 | 3    | 42    | XY | 2   | 0   | 66.7  | 0.0 |
| <b>SAGD_00056</b> | Homo sapiens | SRP012682 | liver                          | unknown | 18 | 20 | 16   | 36    | XY | 2   | 0   | 12.5  | 0.0 |
| <b>SAGD_00057</b> | Homo sapiens | SRP012682 | lower leg skin                 | unknown | 14 | 20 | 4    | 44    | XY | 2   | 1   | 50.0  | 2.3 |
| <b>SAGD_00058</b> | Homo sapiens | SRP012682 | lung                           | unknown | 17 | 19 | 9    | 33    | XY | 3   | 0   | 33.3  | 0.0 |
| <b>SAGD_00059</b> | Homo sapiens | SRP012682 | minor salivary gland           | unknown | 6  | 14 | 5    | 33    | XY | 2   | 0   | 40.0  | 0.0 |
| <b>SAGD_00060</b> | Homo sapiens | SRP012682 | nucleus accumbens              | unknown | 17 | 20 | 5    | 39    | XY | 3   | 0   | 60.0  | 0.0 |
| <b>SAGD_00061</b> | Homo sapiens | SRP012682 | pancreas                       | unknown | 17 | 20 | 3    | 31    | XY | 3   | 0   | 100.0 | 0.0 |
| <b>SAGD_00062</b> | Homo sapiens | SRP012682 | pituitary gland                | unknown | 20 | 15 | 8    | 45    | XY | 2   | 1   | 25.0  | 2.2 |
| <b>SAGD_00063</b> | Homo sapiens | SRP012682 | putamen                        | unknown | 14 | 20 | 10   | 37    | XY | 2   | 1   | 20.0  | 2.7 |
| <b>SAGD_00064</b> | Homo sapiens | SRP012682 | sigmoid colon                  | unknown | 18 | 20 | 320  | 52    | XY | 5   | 0   | 1.6   | 0.0 |
| <b>SAGD_00065</b> | Homo sapiens | SRP012682 | skeletal muscle tissue         | unknown | 15 | 20 | 2    | 35    | XY | 2   | 0   | 100.0 | 0.0 |
| <b>SAGD_00066</b> | Homo sapiens | SRP012682 | small intestine Peyer's patch  | unknown | 16 | 20 | 17   | 91    | XY | 2   | 3   | 11.8  | 3.3 |
| <b>SAGD_00067</b> | Homo sapiens | SRP012682 | spleen                         | unknown | 17 | 18 | 5    | 32    | XY | 4   | 0   | 80.0  | 0.0 |
| <b>SAGD_00068</b> | Homo sapiens | SRP012682 | stomach                        | unknown | 20 | 17 | 2    | 33    | XY | 2   | 0   | 100.0 | 0.0 |
| <b>SAGD_00069</b> | Homo sapiens | SRP012682 | subcutaneous adipose tissue    | unknown | 16 | 20 | 19   | 114   | XY | 4   | 2   | 21.1  | 1.8 |
| <b>SAGD_00070</b> | Homo sapiens | SRP012682 | substantia nigra               | unknown | 9  | 11 | 9    | 31    | XY | 2   | 1   | 22.2  | 3.2 |
| <b>SAGD_00071</b> | Homo sapiens | SRP012682 | suprapubic skin                | unknown | 16 | 20 | 8    | 100   | XY | 2   | 0   | 25.0  | 0.0 |
| <b>SAGD_00072</b> | Homo sapiens | SRP012682 | thyroid gland                  | unknown | 17 | 19 | 13   | 35    | XY | 4   | 0   | 30.8  | 0.0 |
| <b>SAGD_00073</b> | Homo sapiens | SRP012682 | tibial artery                  | unknown | 14 | 20 | 3    | 49    | XY | 2   | 0   | 66.7  | 0.0 |

|                   |                |           |                             |         |    |    |      |      |    |    |    |       |     |
|-------------------|----------------|-----------|-----------------------------|---------|----|----|------|------|----|----|----|-------|-----|
| <b>SAGD_00074</b> | Homo sapiens   | SRP012682 | tibial nerve                | unknown | 19 | 20 | 3    | 35   | XY | 2  | 0  | 66.7  | 0.0 |
| <b>SAGD_00075</b> | Homo sapiens   | SRP012682 | transformed skin fibroblast | unknown | 15 | 20 | 5    | 30   | XY | 2  | 0  | 40.0  | 0.0 |
| <b>SAGD_00076</b> | Homo sapiens   | SRP012682 | transverse colon            | unknown | 18 | 19 | 5    | 34   | XY | 2  | 0  | 40.0  | 0.0 |
| <b>SAGD_00077</b> | Homo sapiens   | SRP012682 | urinary bladder             | unknown | 5  | 5  | 18   | 27   | XY | 2  | 0  | 11.1  | 0.0 |
| <b>SAGD_00106</b> | Homo sapiens   | SRP021917 | colon                       | unknown | 3  | 2  | 14   | 48   | XY | 2  | 2  | 14.3  | 4.2 |
| <b>SAGD_00107</b> | Homo sapiens   | SRP022133 | whole blood                 | adult   | 3  | 17 | 43   | 83   | XY | 0  | 2  | 0.0   | 2.4 |
| <b>SAGD_00108</b> | Homo sapiens   | SRP027364 | thyroid gland tumor         | adult   | 2  | 2  | 11   | 60   | XY | 1  | 2  | 9.1   | 3.3 |
| <b>SAGD_00129</b> | Homo sapiens   | SRP038863 | long bone                   | child   | 2  | 2  | 1159 | 1122 | XY | 38 | 25 | 3.3   | 2.2 |
| <b>SAGD_00130</b> | Homo sapiens   | SRP038863 | skull                       | child   | 1  | 3  | 19   | 12   | XY | 0  | 0  | 0.0   | 0.0 |
| <b>SAGD_00131</b> | Homo sapiens   | SRP043221 | muscle                      | unknown | 6  | 13 | 10   | 33   | XY | 3  | 0  | 30.0  | 0.0 |
| <b>SAGD_00132</b> | Homo sapiens   | SRP043221 | myoblast                    | unknown | 4  | 2  | 374  | 304  | XY | 11 | 5  | 2.9   | 1.6 |
| <b>SAGD_00133</b> | Homo sapiens   | SRP043221 | myotube                     | unknown | 5  | 3  | 13   | 45   | XY | 1  | 3  | 7.7   | 6.7 |
| <b>SAGD_00135</b> | Homo sapiens   | SRP045666 | skeletal muscle             | unknown | 16 | 17 | 7    | 24   | XY | 1  | 0  | 14.3  | 0.0 |
| <b>SAGD_00137</b> | Homo sapiens   | SRP046233 | bone marrow                 | adult   | 5  | 9  | 1    | 6    | XY | 1  | 0  | 100.0 | 0.0 |
| <b>SAGD_00138</b> | Homo sapiens   | SRP050146 | bone marrow                 | unknown | 2  | 2  | 56   | 126  | XY | 1  | 1  | 1.8   | 0.8 |
| <b>SAGD_00153</b> | Homo sapiens   | SRP056604 | hippocampus                 | adult   | 2  | 2  | 8    | 14   | XY | 0  | 0  | 0.0   | 0.0 |
| <b>SAGD_00158</b> | Homo sapiens   | SRP066197 | blood                       | adult   | 10 | 10 | 3    | 23   | XY | 3  | 0  | 100.0 | 0.0 |
| <b>SAGD_00163</b> | Homo sapiens   | SRP074349 | lung                        | adult   | 19 | 20 | 84   | 260  | XY | 5  | 5  | 6.0   | 1.9 |
| <b>SAGD_00017</b> | Macaca mulatta | SRP001558 | liver                       | adult   | 6  | 6  | 26   | 131  | XY | 1  | 2  | 3.8   | 1.5 |
| <b>SAGD_00003</b> | Mus musculus   | ERP008773 | embryo                      | fetus   | 20 | 20 | 1    | 5    | XY | 1  | 0  | 100.0 | 0.0 |
| <b>SAGD_00004</b> | Mus musculus   | ERP008773 | whole body                  | fetus   | 20 | 20 | 1    | 2    | XY | 1  | 0  | 100.0 | 0.0 |
| <b>SAGD_00020</b> | Mus musculus   | SRP002811 | medial prefrontal cortex    | child   | 4  | 4  | 1    | 5    | XY | 1  | 0  | 100.0 | 0.0 |
| <b>SAGD_00021</b> | Mus musculus   | SRP002811 | preoptic area               | child   | 4  | 4  | 1    | 1    | XY | 1  | 0  | 100.0 | 0.0 |
| <b>SAGD_00105</b> | Mus musculus   | SRP020636 | liver                       | adult   | 20 | 20 | 144  | 169  | XY | 5  | 3  | 3.5   | 1.8 |
| <b>SAGD_00143</b> | Mus musculus   | SRP053401 | brainstem                   | adult   | 4  | 4  | 2    | 5    | XY | 1  | 0  | 50.0  | 0.0 |
| <b>SAGD_00144</b> | Mus musculus   | SRP053401 | brown adipose tissue        | adult   | 4  | 4  | 24   | 17   | XY | 1  | 0  | 4.2   | 0.0 |

|                   |                        |           |                                          |       |    |    |     |      |    |    |    |       |      |
|-------------------|------------------------|-----------|------------------------------------------|-------|----|----|-----|------|----|----|----|-------|------|
| <b>SAGD_00145</b> | Mus musculus           | SRP053401 | cerebellum                               | adult | 4  | 4  | 2   | 5    | XY | 1  | 0  | 50.0  | 0.0  |
| <b>SAGD_00146</b> | Mus musculus           | SRP053401 | corpus callosum                          | adult | 4  | 4  | 1   | 6    | XY | 1  | 0  | 100.0 | 0.0  |
| <b>SAGD_00147</b> | Mus musculus           | SRP053401 | gastrocnemius                            | adult | 4  | 4  | 91  | 56   | XY | 3  | 2  | 3.3   | 3.6  |
| <b>SAGD_00148</b> | Mus musculus           | SRP053401 | heart                                    | adult | 4  | 4  | 1   | 7    | XY | 1  | 0  | 100.0 | 0.0  |
| <b>SAGD_00149</b> | Mus musculus           | SRP053401 | hypothalamus and thalamus                | adult | 4  | 4  | 1   | 5    | XY | 1  | 0  | 100.0 | 0.0  |
| <b>SAGD_00150</b> | Mus musculus           | SRP053401 | skin                                     | adult | 3  | 3  | 51  | 516  | XY | 3  | 4  | 5.9   | 0.8  |
| <b>SAGD_00151</b> | Mus musculus           | SRP053401 | white adipose tissue around<br>gonad     | adult | 3  | 4  | 267 | 227  | XY | 7  | 10 | 2.6   | 4.4  |
| <b>SAGD_00152</b> | Mus musculus           | SRP053401 | white adipose tissue around<br>intestine | adult | 4  | 4  | 7   | 17   | XY | 1  | 2  | 14.3  | 11.8 |
| <b>SAGD_00155</b> | Mus musculus           | SRP060293 | hypothalamus                             | adult | 6  | 3  | 1   | 2    | XY | 0  | 0  | 0.0   | 0.0  |
| <b>SAGD_00160</b> | Mus musculus           | SRP068123 | hippocampus                              | adult | 18 | 18 | 1   | 7    | XY | 1  | 0  | 100.0 | 0.0  |
| <b>SAGD_00180</b> | Mus musculus           | SRP102060 | parotid gland                            | adult | 3  | 3  | 1   | 7    | XY | 1  | 0  | 100.0 | 0.0  |
| <b>SAGD_00181</b> | Mus musculus           | SRP102060 | sublingual gland                         | adult | 3  | 3  | 6   | 4    | XY | 1  | 0  | 16.7  | 0.0  |
| <b>SAGD_00182</b> | Mus musculus           | SRP102060 | submandibular gland                      | adult | 3  | 3  | 57  | 162  | XY | 2  | 0  | 3.5   | 0.0  |
| <b>SAGD_00018</b> | Pan troglodytes        | SRP001558 | liver                                    | adult | 6  | 6  | 68  | 125  | XY | 2  | 1  | 2.9   | 0.8  |
| <b>SAGD_00109</b> | Pristionchus pacificus | SRP034667 | whole body                               | adult | 3  | 3  | 973 | 1898 | NA | NA | NA | NA    | NA   |
| <b>SAGD_00111</b> | Rattus norvegicus      | SRP037986 | adrenal gland                            | adult | 12 | 12 | 26  | 25   | XY | 4  | 2  | 15.4  | 8.0  |
| <b>SAGD_00112</b> | Rattus norvegicus      | SRP037986 | adrenal gland                            | child | 4  | 4  | 12  | 13   | XY | 3  | 1  | 25.0  | 7.7  |
| <b>SAGD_00113</b> | Rattus norvegicus      | SRP037986 | brain                                    | adult | 12 | 12 | 4   | 8    | XY | 3  | 0  | 75.0  | 0.0  |
| <b>SAGD_00114</b> | Rattus norvegicus      | SRP037986 | brain                                    | child | 4  | 4  | 3   | 6    | XY | 3  | 0  | 100.0 | 0.0  |
| <b>SAGD_00115</b> | Rattus norvegicus      | SRP037986 | gastrocnemius                            | adult | 12 | 12 | 3   | 97   | XY | 3  | 2  | 100.0 | 2.1  |
| <b>SAGD_00116</b> | Rattus norvegicus      | SRP037986 | gastrocnemius                            | child | 4  | 4  | 7   | 90   | XY | 3  | 3  | 42.9  | 3.3  |
| <b>SAGD_00117</b> | Rattus norvegicus      | SRP037986 | heart                                    | adult | 12 | 12 | 3   | 10   | XY | 3  | 0  | 100.0 | 0.0  |
| <b>SAGD_00118</b> | Rattus norvegicus      | SRP037986 | heart                                    | child | 4  | 4  | 16  | 12   | XY | 3  | 0  | 18.8  | 0.0  |
| <b>SAGD_00119</b> | Rattus norvegicus      | SRP037986 | kidney                                   | adult | 12 | 12 | 19  | 44   | XY | 3  | 4  | 15.8  | 9.1  |

|                   |                   |           |                           |       |    |    |    |    |    |   |   |       |      |
|-------------------|-------------------|-----------|---------------------------|-------|----|----|----|----|----|---|---|-------|------|
| <b>SAGD_00120</b> | Rattus norvegicus | SRP037986 | kidney                    | child | 4  | 4  | 6  | 9  | XY | 3 | 0 | 50.0  | 0.0  |
| <b>SAGD_00121</b> | Rattus norvegicus | SRP037986 | liver                     | adult | 12 | 12 | 43 | 90 | XY | 4 | 2 | 9.3   | 2.2  |
| <b>SAGD_00122</b> | Rattus norvegicus | SRP037986 | liver                     | child | 4  | 4  | 32 | 21 | XY | 4 | 1 | 12.5  | 4.8  |
| <b>SAGD_00123</b> | Rattus norvegicus | SRP037986 | lung                      | adult | 12 | 12 | 3  | 12 | XY | 3 | 0 | 100.0 | 0.0  |
| <b>SAGD_00124</b> | Rattus norvegicus | SRP037986 | lung                      | child | 4  | 4  | 32 | 18 | XY | 3 | 0 | 9.4   | 0.0  |
| <b>SAGD_00125</b> | Rattus norvegicus | SRP037986 | spleen                    | adult | 12 | 12 | 3  | 12 | XY | 3 | 0 | 100.0 | 0.0  |
| <b>SAGD_00126</b> | Rattus norvegicus | SRP037986 | spleen                    | child | 4  | 4  | 9  | 34 | XY | 3 | 1 | 33.3  | 2.9  |
| <b>SAGD_00127</b> | Rattus norvegicus | SRP037986 | thymus                    | adult | 12 | 12 | 16 | 21 | XY | 3 | 0 | 18.8  | 0.0  |
| <b>SAGD_00128</b> | Rattus norvegicus | SRP037986 | thymus                    | child | 4  | 4  | 3  | 5  | XY | 3 | 0 | 100.0 | 0.0  |
| <b>SAGD_00179</b> | Rattus norvegicus | SRP100621 | ventricular myocytes      | adult | 5  | 6  | 21 | 47 | XY | 3 | 4 | 14.3  | 8.5  |
| <b>SAGD_00190</b> | Rattus norvegicus | SRP110541 | Extensor digitorum longus | adult | 6  | 6  | 24 | 11 | XY | 0 | 5 | 0.0   | 45.5 |
| <b>SAGD_00191</b> | Rattus norvegicus | SRP110541 | Soleus                    | adult | 6  | 6  | 12 | 23 | XY | 4 | 0 | 33.3  | 0.0  |

Notes:

<sup>1</sup> Identifier for SAGD;

<sup>2</sup> SRA project accession for the group;

<sup>3</sup> Number of female samples in the group;

<sup>4</sup> Number of male samples in the group;

<sup>5</sup> Number of female-biased genes in the group;

<sup>6</sup> Number of male-biased genes in the group;

<sup>7</sup> Sex determination system in the species. NA: No sex chromosome can be identified in the reference genome;

<sup>8</sup> Number of female-biased genes on the X or Z chromosome;

<sup>9</sup> Number of male-biased genes on the X or Z chromosome;

<sup>10</sup> Percentage of female-biased genes on the X or Z chromosome;

<sup>11</sup> Percentage of male-biased genes on the X or Z chromosome.

Supplementary Table 2. Sex bias comparison among somatic tissues of human adults.

| tissue                     | SAG_num <sup>1</sup> | SAG_M_num <sup>2</sup> | SAG_F_num <sup>3</sup> | M_M_num <sup>4</sup> | F_F_num <sup>5</sup> | retained_num <sup>6</sup> | retained% <sup>7</sup> |
|----------------------------|----------------------|------------------------|------------------------|----------------------|----------------------|---------------------------|------------------------|
| <b>skeletal muscle</b>     | 46                   | 26                     | 20                     | 12                   | 1                    | 13                        | 28.3                   |
| <b>skin</b>                | 590                  | 531                    | 59                     | 42                   | 13                   | 55                        | 9.3                    |
| <b>liver</b>               | 903                  | 556                    | 347                    | 41                   | 18                   | 59                        | 6.5                    |
| <b>whole blood</b>         | 126                  | 83                     | 43                     | 2                    | 1                    | 3                         | 2.4                    |
| <b>thyroid gland tumor</b> | 71                   | 60                     | 11                     | 20                   | 2                    | 22                        | 31.0                   |
| <b>bone marrow</b>         | 7                    | 6                      | 1                      | 0                    | 1                    | 1                         | 14.3                   |
| <b>hippocampus</b>         | 30                   | 21                     | 9                      | 8                    | 3                    | 11                        | 36.7                   |
| <b>blood</b>               | 54                   | 42                     | 12                     | 19                   | 2                    | 21                        | 38.9                   |
| <b>lung</b>                | 359                  | 272                    | 87                     | 34                   | 7                    | 41                        | 11.4                   |

Notes:

<sup>1</sup> Number of SAGs, including male-biased genes and female-biased genes, in the tissues;

<sup>2</sup> Number of male-biased genes in the tissue;

<sup>3</sup> Number of female-biased genes in the tissue;

<sup>4</sup> Number of male-biased genes in the tissue with male-biased expression in at least one of the other tissues of human adults;

<sup>5</sup> Number of female-biased genes in the tissue with female-biased expression in at least one of the other tissues of human adults;

<sup>6</sup> Number of SAGs in the tissue with shared sex bias in at least one of the other tissues of human adults. It is the sum of M\_M\_num and F\_F\_num;

<sup>7</sup> Percentage of SAGs in the tissue with shared sex bias in at least one of the other tissues of human adults.



Supplementary Table 3. Sex bias comparison between adult somatic tissues of human and other species.

| <b>Species</b>    | <b>ortholog_num<sup>1</sup></b> | <b>SAG_M_num<sup>2</sup></b> | <b>SAG_F_num<sup>3</sup></b> | <b>M_M_num<sup>4</sup></b> | <b>F_F_num<sup>5</sup></b> | <b>retained_num<sup>6</sup></b> | <b>retained%<sup>7</sup></b> |
|-------------------|---------------------------------|------------------------------|------------------------------|----------------------------|----------------------------|---------------------------------|------------------------------|
| <b>Chimpanzee</b> | 24285                           | 1684                         | 1916                         | 45                         | 20                         | 65                              | 1.8                          |
| <b>Macaque</b>    | 22054                           | 1541                         | 1755                         | 19                         | 8                          | 27                              | 0.8                          |
| <b>Mouse</b>      | 20157                           | 1612                         | 1849                         | 195                        | 123                        | 318                             | 9.2                          |
| <b>Rat</b>        | 19585                           | 1565                         | 1792                         | 62                         | 49                         | 111                             | 3.3                          |
| <b>Cow</b>        | 19749                           | 1572                         | 1786                         | 14                         | 9                          | 23                              | 0.7                          |
| <b>Horse</b>      | 18824                           | 1545                         | 1751                         | 4                          | 2                          | 6                               | 0.2                          |
| <b>Chicken</b>    | 15610                           | 1287                         | 1524                         | 23                         | 106                        | 129                             | 4.6                          |

Notes:

<sup>1</sup> Number of human genes with orthologs in the species;

<sup>2</sup> Number of human male-biased genes with orthologs in the species;

<sup>3</sup> Number of human female-biased genes with orthologs in the species;

<sup>4</sup> Number of human male-biased genes with male-biased orthologs in the species;

<sup>5</sup> Number of human female-biased genes with female-biased orthologs in the species;

<sup>6</sup> Number of human SAGs with shared sex bias in the species. It is the sum of M\_M\_num and F\_F\_num;

<sup>7</sup> Percentage of human SAGs with shared sex bias in the species [ $100 \times \text{retained\_number} / (\text{SAG\_M\_num} + \text{SAG\_F\_num})$ ].
